# Supplementary material for: Barriers and enablers of kangaroo mother care implementation from a health systems perspective: a systematic review
Source: PubMed Central journal article supplement (PMC5886293; doi:10.1093/heapol/czx098), 2017-08-24
Supplement: supplementary_table1_czx098.pdf [file supplementary_table1_czx098.pdf]

**Supplementary Table 1: Studies included in the Barriers and Enablers of Kangaroo Mother Care Implementation from a Health Systems Perspective: A Systematic Review (n=86)**

| Author     | Year | Title                                                                                                                | Country      | Rural or Urban | Study design                                | Sample Size           | Newborn Characteristics | KMC components   | Onset of SSC                  | Hours per day KMC Provision | Number of days of KMC provision | Health care workers barriers and facilitators | Facilities barriers and facilitators | Policy and guideline barriers and facilitators |
|------------|------|----------------------------------------------------------------------------------------------------------------------|--------------|----------------|---------------------------------------------|-----------------------|-------------------------|------------------|-------------------------------|-----------------------------|---------------------------------|-----------------------------------------------|--------------------------------------|------------------------------------------------|
| Abul-Fadl  | 2012 | Evaluation of mothers' knowledge, attitudes, and practice towards the ten steps to successful breastfeeding in Egypt | Egypt        | Mixed          | Pop based surveillance, facility evaluation | 1052 Mothers          | All ages                | SSC              | N/A                           | N/A                         | N/A                             | X                                             | X                                    | -                                              |
| Aliganyira | 2014 | Helping small babies survive: an evaluation of facility-based Kangaroo Mother Care implementation progress in Uganda | Uganda       | Mixed          | Facility evaluation, Focus group/interview  | 11 facilities         | N/A                     | SSC              | N/A                           | N/A                         | N/A                             | X                                             | X                                    | -                                              |
| Araújo     | 2010 | Mother Kangaroo Method: an investigation about the domestic practice                                                 | Brazil       | Urban          | Focus group/interview                       | 30 Parents            | Premature, $\geq 2000g$ | N/A              | Once eligible: N/A definition | 5-6                         | N/A                             | X                                             | X                                    | -                                              |
| Bergh      | 2013 | Progress with the implementation of kangaroo mother care in four regions in Ghana                                    | Ghana        | N/A            | Facility evaluation                         | 38 Facilities         | N/A                     | SSC, EBF, FU     | Immediately after birth       | N/A                         | N/A                             | X                                             | X                                    | X                                              |
| Bergh      | 2003 | Development of a conceptual tool for the implementation of kangaroo mother care                                      | South Africa | Urban          | Facility evaluation                         | 2 Facilities          | N/A                     | N/A              | N/A                           | N/A                         | N/A                             | X                                             | X                                    | -                                              |
| Bergh      | 2008 | Scaling up kangaroo mother care in South Africa: 'on-site' versus 'off-site' educational facilitation                | South Africa | Mixed          | RCT                                         | 36 Facilities         | N/A                     | N/A              | N/A                           | N/A                         | N/A                             | X                                             | X                                    | -                                              |
| Bergh      | 2012 | Translating research findings into practice--the implementation of kangaroo mother care in Ghana                     | Ghana        | N/A            | Pop based surveillance, facility evaluation | 38 Facilities         | N/A                     | N/A              | N/A                           | N/A                         | N/A                             | X                                             | -                                    | X                                              |
| Bergh      | 2009 | Scaling up Kangaroo Mother Care in Ghana                                                                             | Ghana        | N/A            | Facility evaluation                         | 4 Regions (out of 10) | N/A                     | N/A              | N/A                           | N/A                         | N/A                             | X                                             | X                                    | -                                              |
| Bergh      | 2012 | Evaluation of Kangaroo Mother Care Services in Malawi                                                                | Malawi       | N/A            | Facility evaluation                         | 14 facilities         | N/A                     | N/A              | N/A                           | N/A                         | N/A                             | X                                             | X                                    | X                                              |
| Bergh      | 2012 | Evaluation of Kangaroo Mother Care Services in Mali                                                                  | Mali         | N/A            | Facility evaluation                         | 7 Facilities          | N/A                     | SSC, EBF, DC, FU | N/A                           | N/A                         | N/A                             | X                                             | X                                    | X                                              |

|                   |      |                                                                                                                                      |                                  |       |                                            |                         |                        |             |                               |     |     |   |   |   |
|-------------------|------|--------------------------------------------------------------------------------------------------------------------------------------|----------------------------------|-------|--------------------------------------------|-------------------------|------------------------|-------------|-------------------------------|-----|-----|---|---|---|
| Bergh             | 2007 | Retrospective Evaluation of Kangaroo Mother Care Practices in Malawian Hospitals                                                     | Malawi, South Africa             | N/A   | Facility evaluation                        | 6 Facilities            | N/A                    | N/A         | N/A                           | N/A | N/A | X | X | - |
| Bergh             | 2012 | Evaluation of Kangaroo Mother Care Services in Rwanda                                                                                | Rwanda                           | N/A   | Facility evaluation                        | 7 Facilities            | N/A                    | N/A         | N/A                           | N/A | N/A | X | X | - |
| Bergh             | 2012 | Evaluation of Kangaroo Mother Care Services in Uganda                                                                                | Uganda                           | N/A   | Facility evaluation                        | 11 Facilities           | N/A                    | N/A         | N/A                           | N/A | N/A | X | X | X |
| Bergh             | 2014 | Implementing facility-based kangaroo mother care services: lessons from a multi-country study in Africa                              | Malawi, Mali, Rwanda, and Uganda | Urban | Facility evaluation, Focus group/interview | 39 facilities           | N/A                    | SSC         | N/A                           | N/A | N/A | X | X | X |
| Blencowe          | 2009 | Safety, effectiveness and barriers to follow-up using an 'early discharge' Kangaroo Care policy in a resource poor setting           | Malawi                           | Urban | Prospective cohort                         | 272 Newborns            | <2000g                 | N/A         | Once eligible: N/A definition | N/A | N/A | - | X | - |
| Blomqvist         | 2013 | Provision of Kangaroo Mother Care: supportive factors and barriers perceived by parents                                              | Sweden                           | N/A   | Focus group/interview                      | 76 Mother, 74 Fathers   | 28-33 weeks, 740-2920g | SSC         | N/A                           | N/A | N/A | X | X | - |
| Blomqvist         | 2011 | Swedish mothers' experience of continuous Kangaroo Mother Care                                                                       | Sweden                           | Urban | Focus group/interview                      | 23 Dyads                | All ages               | SSC, EBF    | N/A                           | N/A | N/A | X | X | - |
| Boo               | 2007 | Short duration of skin-to-skin contact: Effects on growth and breastfeeding                                                          | Malaysia                         | Urban | RCT                                        | 126 Dyads               | <1501g                 | SSC         | Once eligible: N/A definition | 1   | 10  | X | X | - |
| Brimdyr           | 2012 | A Realistic Evaluation of Two Training Programs on Implementing Skin-to-Skin as a Standard of Care                                   | Egypt                            | N/A   | Focus group/interview                      | 40 Nurses and HCWs      | N/A                    | SSC         | Immediately after birth       | 1   | 1   | X | X | - |
| Calais            | 2010 | Skin-to-skin contact of full term infants: an explorative study of promoting and hindering factors in two Nordic childbirth settings | Sweden, Norway                   | Urban | Focus group/interview                      | 117 Mother, 107 Fathers | Full term              | SSC, DC, FU | Immediately after birth       | N/A | N/A | - | - | X |
| Castiblanco López | 2011 | Vision of mothers in care of premature babies at home                                                                                | Colombia                         | Urban | Focus group/interview                      | 8 Mothers               | <36 weeks, 2320g       | N/A         | N/A                           | N/A | N/A | - | X | - |

|           |      |                                                                                                                                             |                         |       |                        |                                    |                 |             |                               |     |     |   |   |   |
|-----------|------|---------------------------------------------------------------------------------------------------------------------------------------------|-------------------------|-------|------------------------|------------------------------------|-----------------|-------------|-------------------------------|-----|-----|---|---|---|
| Chapak    | 2006 | Resistance to implementing Kangaroo Mother Care in developing countries, and proposed solutions                                             | 15 developing countries | Mixed | Focus group/ interview | 17 KMC coordinators, 15 Facilities | N/A             | SSC, DC, FU | Immediately after birth       | N/A | N/A | X | X | - |
| Chia      | 2006 | The attitudes and practices of neonatal nurses in the use of kangaroo care                                                                  | Australia               | Urban | Focus group/ interview | 34 Nurses                          | N/A             | SSC         | N/A                           | N/A | N/A | X | X | - |
| Colameo   | 2006 | Kangaroo Mother Care in public hospitals in the State of Sao Paulo, Brazil: an analysis of the implementation process                       | Brazil                  | Mixed | Cross sectional        | 28 Facilities                      | LBW; N/A cutoff | N/A         | Once eligible: N/A definition | N/A | N/A | X | X | - |
| Cooper    | 2014 | Close to me: enhancing kangaroo care practice for NICU staff and parents                                                                    | USA                     | Mixed | Pre-post               | 48 nurses and 101 parents          | N/A             | SSC         | N/A                           | N/A | N/A | X | - | - |
| Crenshaw  | 2012 | Use of a video-ethnographic intervention (PRECESS Immersion Method) to improve skin-to-skin care and breastfeeding rates                    | USA                     | N/A   | Descriptive            | 261 Dyads                          | Full term       | SSC         | ≤2min after birth             | N/A |     | X | X | - |
| Dalal     | 2014 | A cross-sectional study on knowledge and attitude regarding kangaroo mother care practice among health care providers in Ahmedabad district | India                   | Mixed | Cross sectional        | 145 HCPs                           | N/A             | N/A         | N/A                           | N/A | N/A | X | - | - |
| Dalbye    | 2011 | Mothers' experiences of skin-to-skin care of healthy full-term newborns - A phenomenology study                                             | Sweden, Norway          | Urban | Focus group/ interview | 20 Mothers                         | Full term       | SSC         | Immediately after birth       | N/A | N/A | X | - | - |
| Darmstadt | 2006 | Introduction of community-based skin-to-skin care in rural Uttar Pradesh, India                                                             | India                   | Rural | Intervention           | 2063 Mothers                       | All ages        | SSC         | N/A                           | N/A | N/A | - | X | - |

|               |      |                                                                                                                           |         |       |                                 |                      |                       |     |                               |         |     |   |   |   |
|---------------|------|---------------------------------------------------------------------------------------------------------------------------|---------|-------|---------------------------------|----------------------|-----------------------|-----|-------------------------------|---------|-----|---|---|---|
| De Vonderweid | 2003 | Neonatal developmental care in Italian Neonatal Intensive Care Units                                                      | Italy   | Mixed | Pop based surveillance          | 109 Facilities       | N/A                   | N/A | N/A                           | N/A     | N/A | X | X | X |
| Duarte        | 2001 | Kangaroo mother care: experience report                                                                                   | Brazil  | Urban | Focus group/ interview          | 1 Mother             | Premature; N/A cutoff | SSC | N/A                           | N/A     | 38  | - | X | - |
| Eichel        | 2001 | Kangaroo care: Expanding our practice to critically ill neonates                                                          | USA     | Urban | Facility evaluation             | 1 Facility           | N/A                   | N/A | N/A                           | N/A     | N/A | X | X | X |
| Eleutério     | 2008 | The imaginary of mothers about experiencing the mother-kangaroo method                                                    | Brazil  | Urban | Focus group/ interview          | 9 Mothers            | Premature; N/A cutoff | N/A | N/A                           | N/A     | N/A | - | X | - |
| Engler        | 2002 | Kangaroo care: national survey of practice, knowledge, barriers, and perceptions                                          | USA     | Mixed | Facility evaluation             | 537 Facilities       | N/A                   | N/A | N/A                           | N/A     | N/A | X | X | - |
| Ferrarello    | 2014 | Barriers to skin-to-skin care during the postpartum stay                                                                  | USA     | Urban | Focus group/ interview          | 15 Mother, 14 Nurses | N/A                   | SSC | N/A                           | N/A     | N/A | - | - | X |
| Flynn         | 2010 | Neonatal nurses' knowledge and beliefs regarding kangaroo care with preterm infants in an Irish neonatal unit             | Ireland | Urban | Focus group/ interview          | 62 HCWs              | N/A                   | N/A | N/A                           | N/A     | N/A | X | - | - |
| Freitas       | 2007 | Kangaroo Mother Method: newborn weight outcome                                                                            | Brazil  | N/A   | Prospective cohort, descriptive | 22 Newborns          | N/A                   | N/A | N/A                           | N/A     | N/A | - | X | - |
| Furlan        | 2003 | Perception of parents in experiencing the kangaroo mother method                                                          | Brazil  | Urban | Focus group/ interview          | 10 Parents           | Premature; N/A cutoff | SSC | Once eligible: N/A definition | 10;mean | N/A | - | X | X |
| Gontijo       | 2012 | Evaluation of the implementation of Kangaroo Care by health administrators, professionals, and mothers of newborn infants | Brazil  | Mixed | Focus group/ interview          | 293 Facilities       | N/A                   | N/A | N/A                           | N/A     | N/A | - | X | - |
| Gonya         | 2013 | Factors associated with maternal visitation and participation in skin-to-skin care in an all referral level IIIc NICU     | USA     | Urban | Focus group/ interview          | 32 Mothers           | <27 weeks             | SSC | N/A                           | N/A     | N/A | - | X | X |



|           |      |                                                                                                                                          |                         |                 |                       |                                                                  |                 |                  |                                                                                                                                                                                                                                     |      |     |   |   |   |
|-----------|------|------------------------------------------------------------------------------------------------------------------------------------------|-------------------------|-----------------|-----------------------|------------------------------------------------------------------|-----------------|------------------|-------------------------------------------------------------------------------------------------------------------------------------------------------------------------------------------------------------------------------------|------|-----|---|---|---|
| Johnson   | 2007 | Factors influencing implementation of kangaroo holding in a Special Care Nursery                                                         | USA                     | Peri-urban/Slum | Focus group/interview | 17 Nurses                                                        | N/A             | N/A              | N/A                                                                                                                                                                                                                                 | N/A  | N/A | X | X | - |
| Kambarami | 2002 | Caregivers' perceptions and experiences of 'kangaroo care' in a developing country                                                       | Zimbabwe                | Urban           | Focus group/interview | 40-48 mothers (4 focus groups with 10-12 participants per group) | LBW: N/A cutoff | N/A              | N/A                                                                                                                                                                                                                                 | N/A  | N/A | - | X | - |
| Kostandy  | 2008 | Kangaroo Care (skin contact) reduces crying response to pain in preterm neonates: pilot results                                          | USA                     | N/A             | RCT crossover         | 10 Newborns                                                      | 30-32 weeks     | SSC              | 30 min before heel stick                                                                                                                                                                                                            | 0.83 | 1   | X | - | - |
| Kymre     | 2013 | Balancing preterm infants' developmental needs with parents' readiness for skin-to-skin care: A phenomenological study                   | Sweden, Norway, Denmark | N/A             | Focus group/interview | 18 Nurses                                                        | N/A             | SSC              | N/A                                                                                                                                                                                                                                 | N/A  | N/A | X | - | - |
| Lee       | 2012 | Clinician perspectives on barriers to and opportunities for skin-to-skin contact for premature infants in neonatal intensive care units  | USA                     | Mixed           | Focus group/interview | 69 HCPs, 11 Facilities                                           | N/A             | SSC              | N/A                                                                                                                                                                                                                                 | N/A  | N/A | X | X | - |
| Lemmen    | 2013 | Kangaroo care in a neonatal context: parents' experiences of information and communication of nurse-parents                              | Sweden                  | N/A             | Focus group/interview | 12 Families                                                      | 24-35 weeks     | SSC              | N/A                                                                                                                                                                                                                                 | N/A  | N/A | X | - | - |
| Lincetto  | 1998 | Impact of season and discharge weight on complications and growth of Kangaroo Mother Care treated low birth weight infants in Mozambique | Mozambique              | Urban           | Prospective cohort    | 246 Newborns                                                     | <2000g          | SSC, EBF, DC, FU | Stabilized health condition, presence of a sucking reflex, thermoregulation, mother's condition enabling her to care for the LBW infant, cessation of the infant's need for IV therapy, oxygen, photo-therapy or feeding by NG tube | >20  | N/A | X | X | - |

|             |      |                                                                                                                                |         |       |                                 |                                   |                       |             |                         |     |     |   |   |   |   |
|-------------|------|--------------------------------------------------------------------------------------------------------------------------------|---------|-------|---------------------------------|-----------------------------------|-----------------------|-------------|-------------------------|-----|-----|---|---|---|---|
| Mallet      | 2007 | [Skin to skin contact in neonatal care: knowledge and expectations of health professionals in 2 neonatal intensive care units] | France  | N/A   | Focus group/ interview          | 121 Doctors and paramedical staff | N/A                   | N/A         | N/A                     | N/A | N/A | X | X | - |   |
| Morelius    | 2015 | Neonatal nurses' beliefs about almost continuous parent-infant skin-to-skin contact in neonatal intensive care                 | Sweden  | Urban | Survey                          | 129 nurses                        | All newborns          | N/A         | N/A                     | N/A | N/A | X | - | - |   |
| Morelius    | 2012 | Time of initiation of skin-to-skin contact in extremely preterm infants in Sweden                                              | Sweden  | Mixed | Pop based surveillance          | 520 Newborns                      | <27 weeks             | SSC         | N/A                     | N/A | N/A | X | - | - |   |
| Nahidi      | 2014 | Opinions of the midwives about enabling factors of skin-to- skin contact immediately after birth: A descriptive study          | Iran    | Urban | Questionnaire                   | 292 midwives                      | N/A                   | N/A         | N/A                     | N/A | N/A | X | - | - |   |
| Namazzi     | 2015 | Strengthening health facilities for maternal and newborn care: experiences from rural eastern Uganda                           | Uganda  | Rural | RCT                             | 20 health facilities              | All newborns          | SSC         | N/A                     | N/A | N/A | X | X | - |   |
| Neu         | 1999 | Parents' perception of skin-to-skin care with their preterm infants requiring assisted ventilation                             | N/A     | Urban | Focus group/ interview          | 8 Mothers, 1 Father               | Premature; N/A cutoff | SSC         | N/A                     |     | 1   | 2 | X | X | - |
| Niela-Vilen | 2013 | Early physical contact between a mother and her NICU-infant in two university hospitals in Finland                             | Finland | Urban | Prospective cohort, qualitative | 170 Mothers, 381 Staff            | all NICU newborns     | N/A         | Immediately after birth | N/A | N/A | X | - | - |   |
| Nimbalkar   | 2014 | Usage of EMBRACE(TM) in Gujarat, India: Survey of Paediatricians                                                               | India   | Urban | Questionnaire                   | 52 paediatricians                 | N/A                   | N/A         | N/A                     | N/A | N/A | X | - | - |   |
| Nyqvist     | 2008 | Application of the baby friendly hospital initiative to neonatal care: suggestions by Swedish mothers of very preterm infants  | Sweden  | N/A   | Focus group/ interview          | 13 Mothers                        | <32 weeks             | SSC, DC, FU | N/A                     | N/A | N/A | X | X | X |   |





|          |      |                                                                                                                                                                                                                                                                 |              |       |                        |                                                                    |          |          |     |     |                                            |   |   |   |
|----------|------|-----------------------------------------------------------------------------------------------------------------------------------------------------------------------------------------------------------------------------------------------------------------|--------------|-------|------------------------|--------------------------------------------------------------------|----------|----------|-----|-----|--------------------------------------------|---|---|---|
| Silva    | 2014 | Conhecimento de técnicos de enfermagem sobre o método canguru na unidade neonatal; Nursing technicians? knowledge of the Kangaroo-Mother Care method in the neonatal unit; Conocimiento de técnicos de enfermería sobre el método Canguro en la unidad neonatal | Brazil       | Urban | Focus group/ interview | 20 nursing technicians                                             | N/A      | N/A      | N/A | N/A | N/A                                        | X | - | - |
| Silva    | 2015 | Nurses' adherence to the Kangaroo Care Method: support for nursing care management                                                                                                                                                                              | Brazil       | Urban | Focus group/ interview | 8 nurses                                                           | N/A      | N/A      | N/A | N/A | N/A                                        | X | - | - |
| Singh    | 2012 | Utilization of postnatal care for newborns and its association with neonatal mortality in India: an analytical appraisal                                                                                                                                        | India        | Mixed | Case control           | 145662 Newborns, 810204 Mothers                                    | All ages | N/A      | N/A | N/A | N/A                                        | - | - | X |
| Sinha    | 2014 | Newborn care practices and home-based postnatal newborn care programme - Mewat, Haryana, India, 2013                                                                                                                                                            | India        | Rural | Focus group/ interview | 320 mothers, 61 Accredited Social Health Activists, 19 home visits | N/A      | SSC, EBF | N/A | N/A | N/A                                        | X | - | - |
| Sloan    | 2008 | Community-based kangaroo mother care to prevent neonatal and infant mortality: a randomized, controlled cluster trial                                                                                                                                           | Bangladesh   | Rural | Cluster RCT            | 39888 Mothers                                                      | All ages | SSC      | N/A | N/A | 2; data available for first 2 days of life | X | - | - |
| Solomons | 2012 | Knowledge and attitudes of nursing staff and mothers towards kangaroo mother care in the eastern sub-district of Cape Town                                                                                                                                      | South Africa | Urban | Cross sectional        | 30 Mothers, 15 Nurses                                              | <2500g   | N/A      | N/A | N/A | N/A                                        | X | X | - |
| Stikes   | 2013 | Applying the plan-do-study-act model to increase the use of kangaroo care                                                                                                                                                                                       | USA          | Urban | Focus group/ interview | 56 Nurses                                                          | N/A      | SSC      | N/A | N/A | N/A                                        | X | X | X |

|          |      |                                                                                                                                                                           |           |       |                        |                                   |                                      |     |                                                                                                                                                                                                                                                                 |                                       |     |   |   |   |
|----------|------|---------------------------------------------------------------------------------------------------------------------------------------------------------------------------|-----------|-------|------------------------|-----------------------------------|--------------------------------------|-----|-----------------------------------------------------------------------------------------------------------------------------------------------------------------------------------------------------------------------------------------------------------------|---------------------------------------|-----|---|---|---|
| Strand   | 2014 | Kangaroo mother care in the neonatal intensive care unit: staff attitudes and beliefs and opportunities for parents                                                       | Sweden    | N/A   | Facility evaluation    | 126 Staff                         | N/A                                  | N/A | N/A                                                                                                                                                                                                                                                             | N/A                                   | N/A | X | X | - |
| Toma     | 2007 | Maternal perception of low birth weight babies before and following the implementation of the Kangaroo Mother Care in a public hospital, in the city of São Paulo, Brazil | Brazil    | Urban | Focus group/ interview | 41 Mothers                        | <2000g                               | N/A | Mean 18 days of life                                                                                                                                                                                                                                            | N/A                                   | N/A | - | X | - |
| Wahlberg | 1992 | A retrospective, comparative study using the kangaroo method as a complement to the standard incubator care                                                               | Sweden    | Urban | Retrospective cohort   | 66 Dyads                          | Premature; N/A cutoff                | SSC | N/A                                                                                                                                                                                                                                                             | N/A                                   | N/A | X | X | - |
| Waiswa   | 2010 | 'I never thought that this baby would survive; I thought that it would die any time': perceptions and care for preterm babies in eastern Uganda                           | Uganda    | Rural | Focus group/ interview | 30 HCW and mothers, 16 Facilities | Premature; N/A cutoff                | N/A | N/A                                                                                                                                                                                                                                                             | N/A                                   | N/A | X | X | - |
| Wobi     | 2010 | Report on the Kangaroo Mother Care Project at Komfo Anokye Teaching Hospital in Kumasi, Ghana                                                                             | Ghana     | Urban | Facility evaluation    | 2 Facilities                      | N/A                                  | N/A | N/A                                                                                                                                                                                                                                                             | N/A                                   | N/A | - | X | - |
| Zhang    | 2014 | Evidence utilization project: implementation of kangaroo care at neonatal ICU                                                                                             | Singapore | Urban | Facility evaluation    | 1 ICU                             | Less than 34 weeks; Less than 1500 g | SSC | Once eligible: stable preterm or LBW babies, excluding infants with poor respiratory status, invasive lines, or parents who are depressed, not willing to do KMC, suffering from infectious skin disease on chest, unfit physically, or with flu-like symptoms. | At least 1 hour several times per day | N/A | X | X | - |

|          |      |                                                                                                                      |        |       |                        |            |     |     |     |     |     |   |   |   |
|----------|------|----------------------------------------------------------------------------------------------------------------------|--------|-------|------------------------|------------|-----|-----|-----|-----|-----|---|---|---|
| Zwedberg | 2015 | Midwives' experiences with mother-infant skin-to-skin contact after a caesarean section: 'fighting an uphill battle' | Sweden | Urban | Focus group/ interview | 8 midwives | N/A | N/A | N/A | N/A | N/A | X | - | - |
|----------|------|----------------------------------------------------------------------------------------------------------------------|--------|-------|------------------------|------------|-----|-----|-----|-----|-----|---|---|---|

**Legend**

- X        Included in study
- Not included in study
- EBF     Exclusive Breast Feeding
- DC      Discharge
- FU      Follow Up
- HCP     Health Care Provider
- HCW     Health Care Worker
- ICU     Intensive Care Unit
- LBW     Low Birth Weight
- N/A     Not available
- NICU    Neonatal Intensive Care Unit
- SSC     Skin to Skin Care
- TBA     Traditional Birthing Attendant
